# Supplementary material
Source: PubMed Central journal article supplement (PMC7205958)

**Italy**

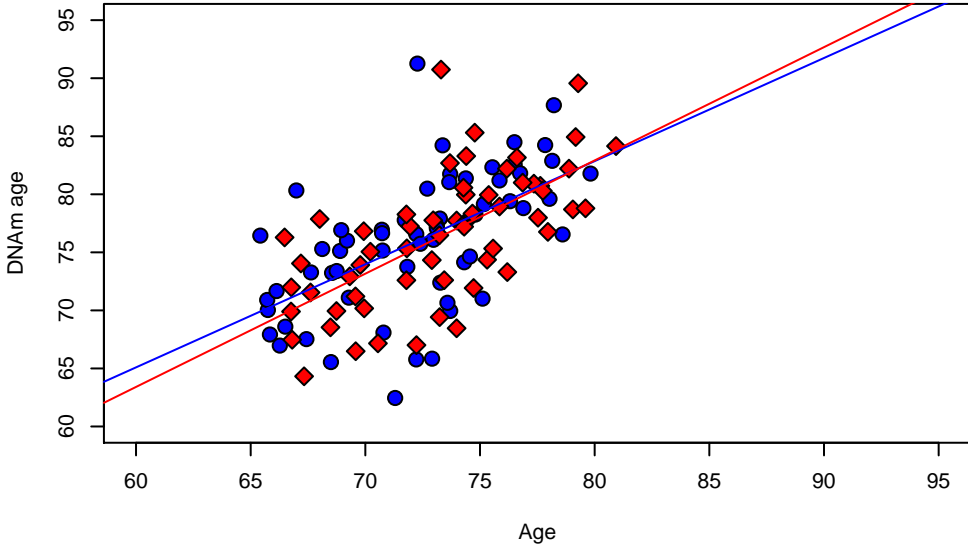

**Italy Males**

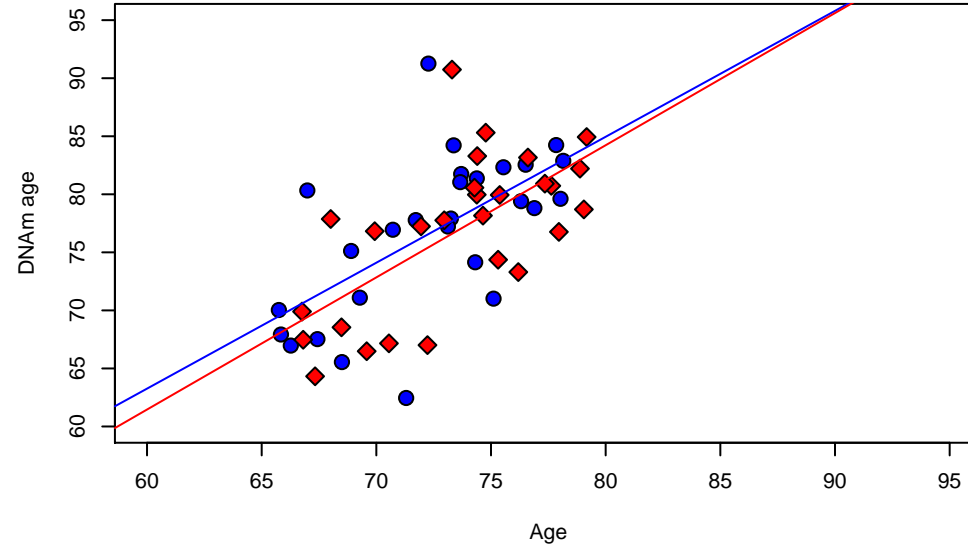

**Italy Females**

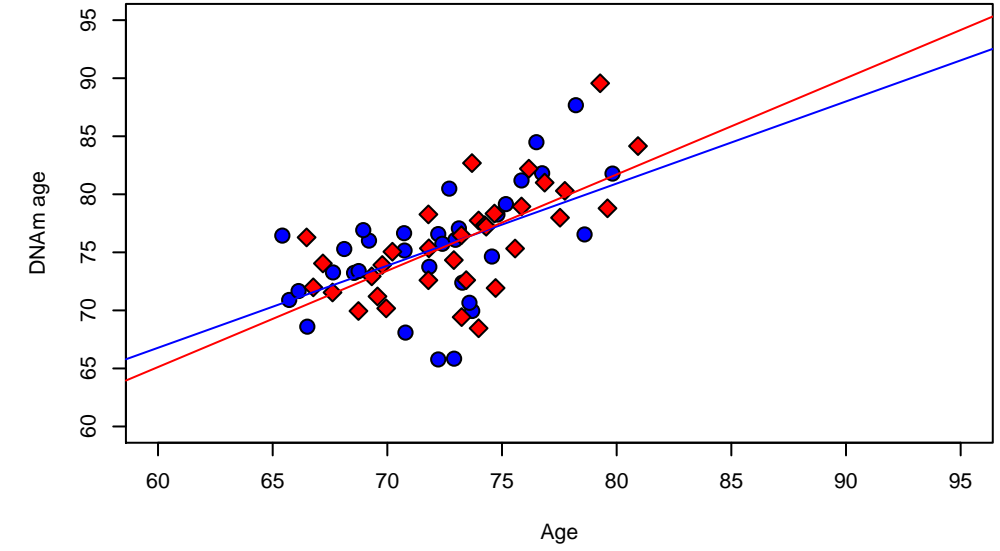

**Poland**

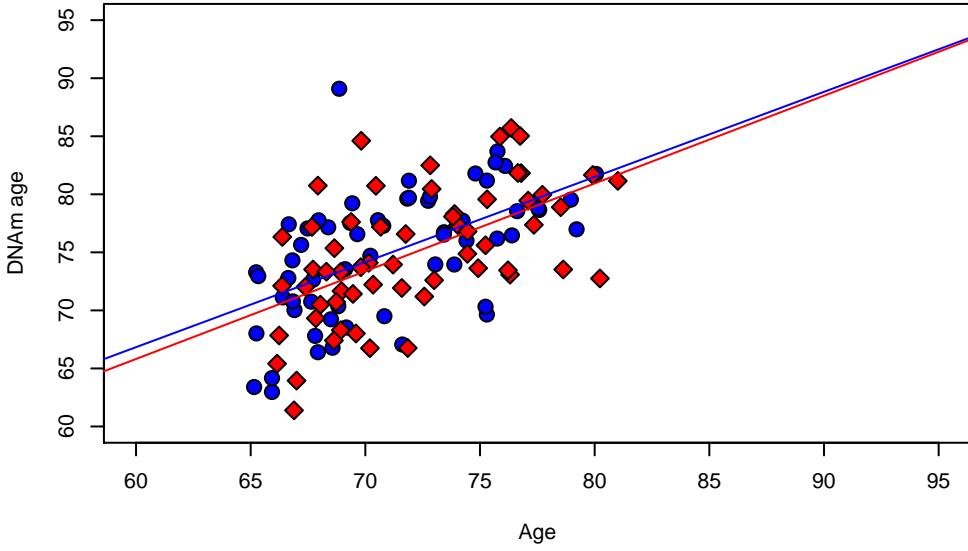

**Poland Males**

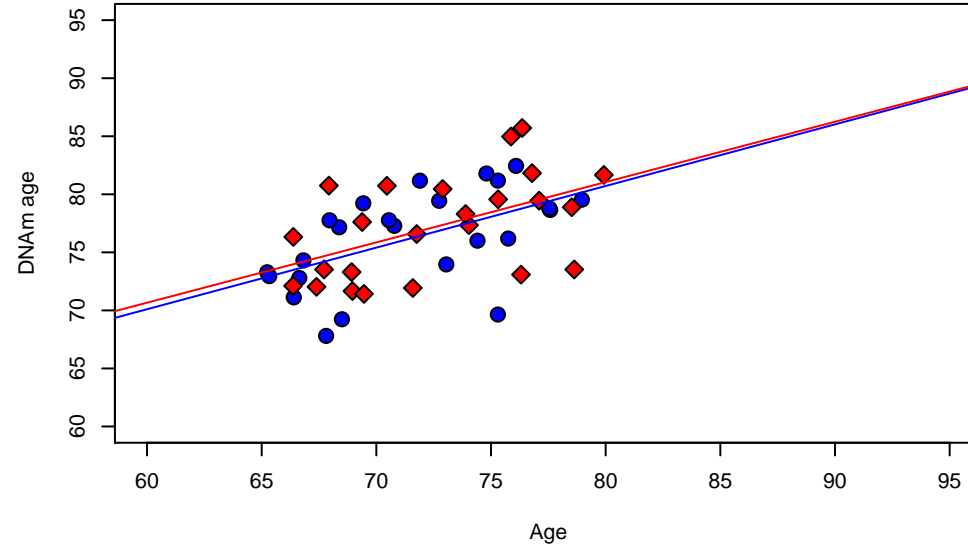

**Poland Females**

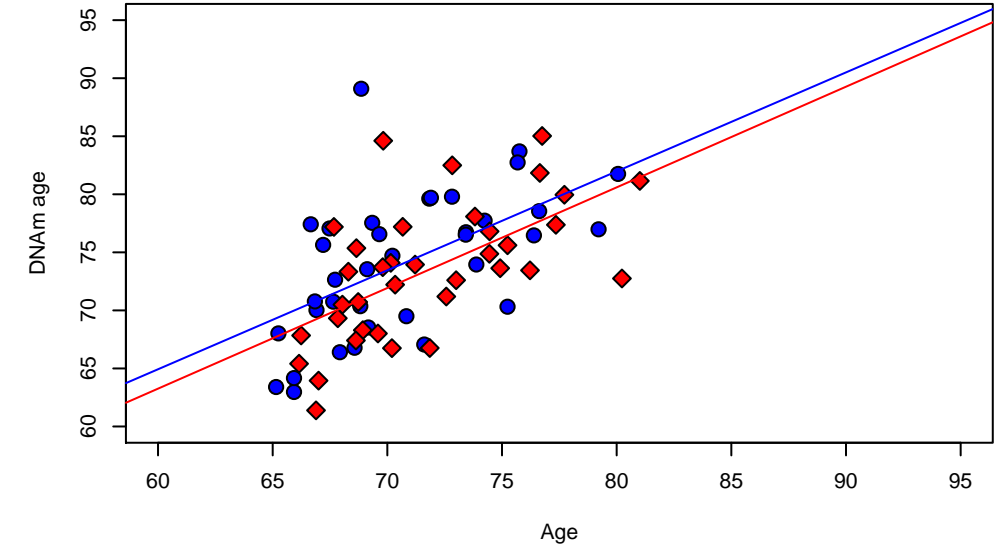

Supplement: 11357_2019_149_MOESM1_ESM.pdf [file 11357_2019_149_MOESM1_ESM.pdf]
