# Supplementary material
Source: PubMed Central journal article supplement (PMC7205958)

**Males + Females**

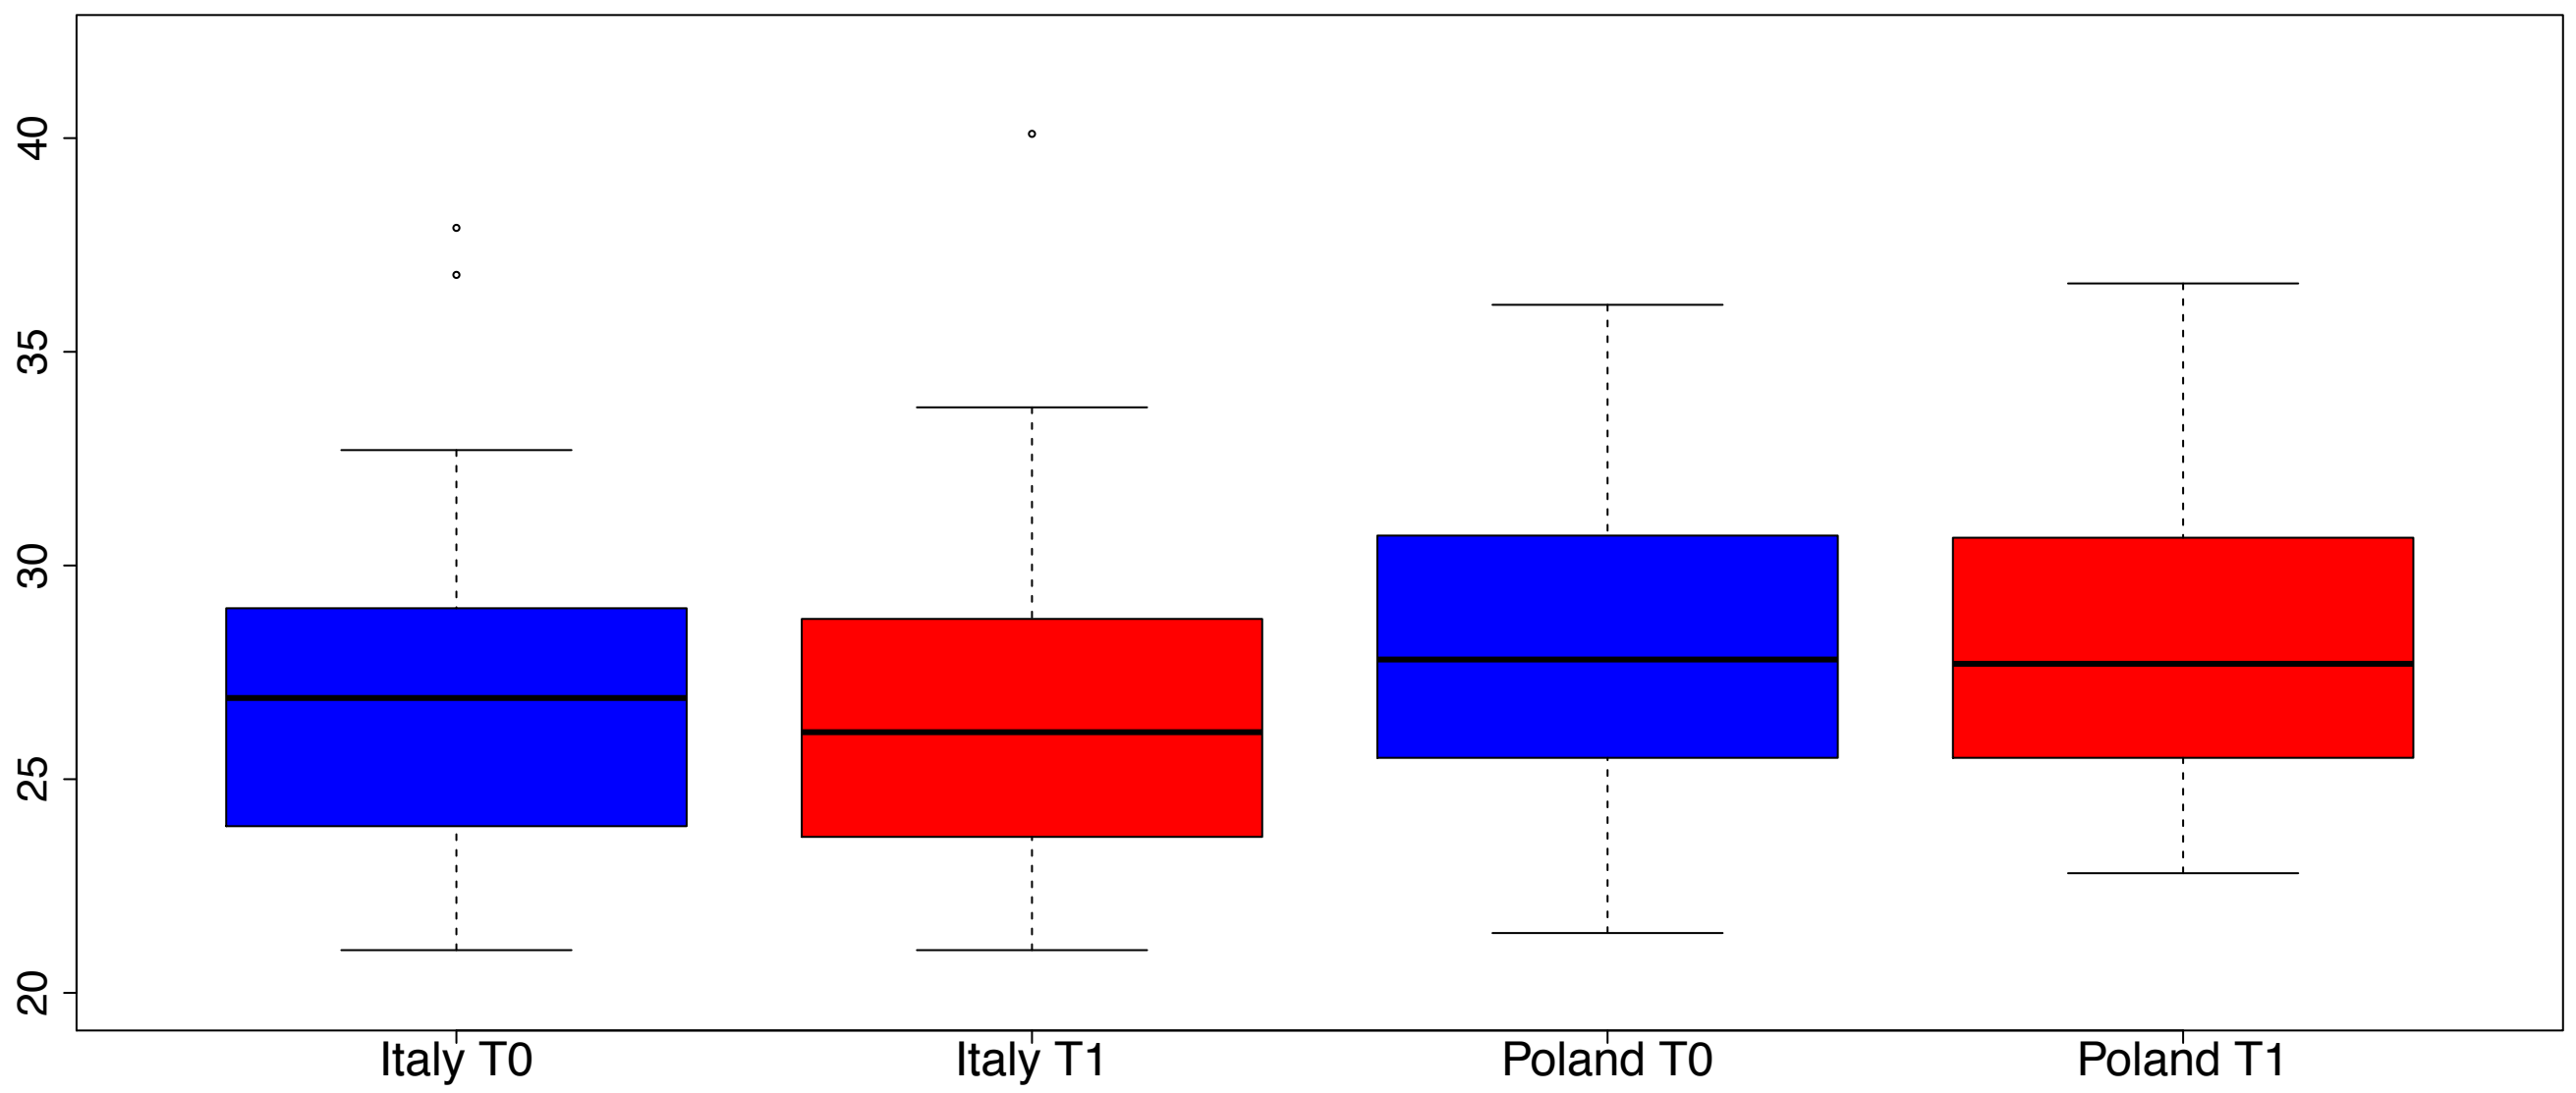

**Males**

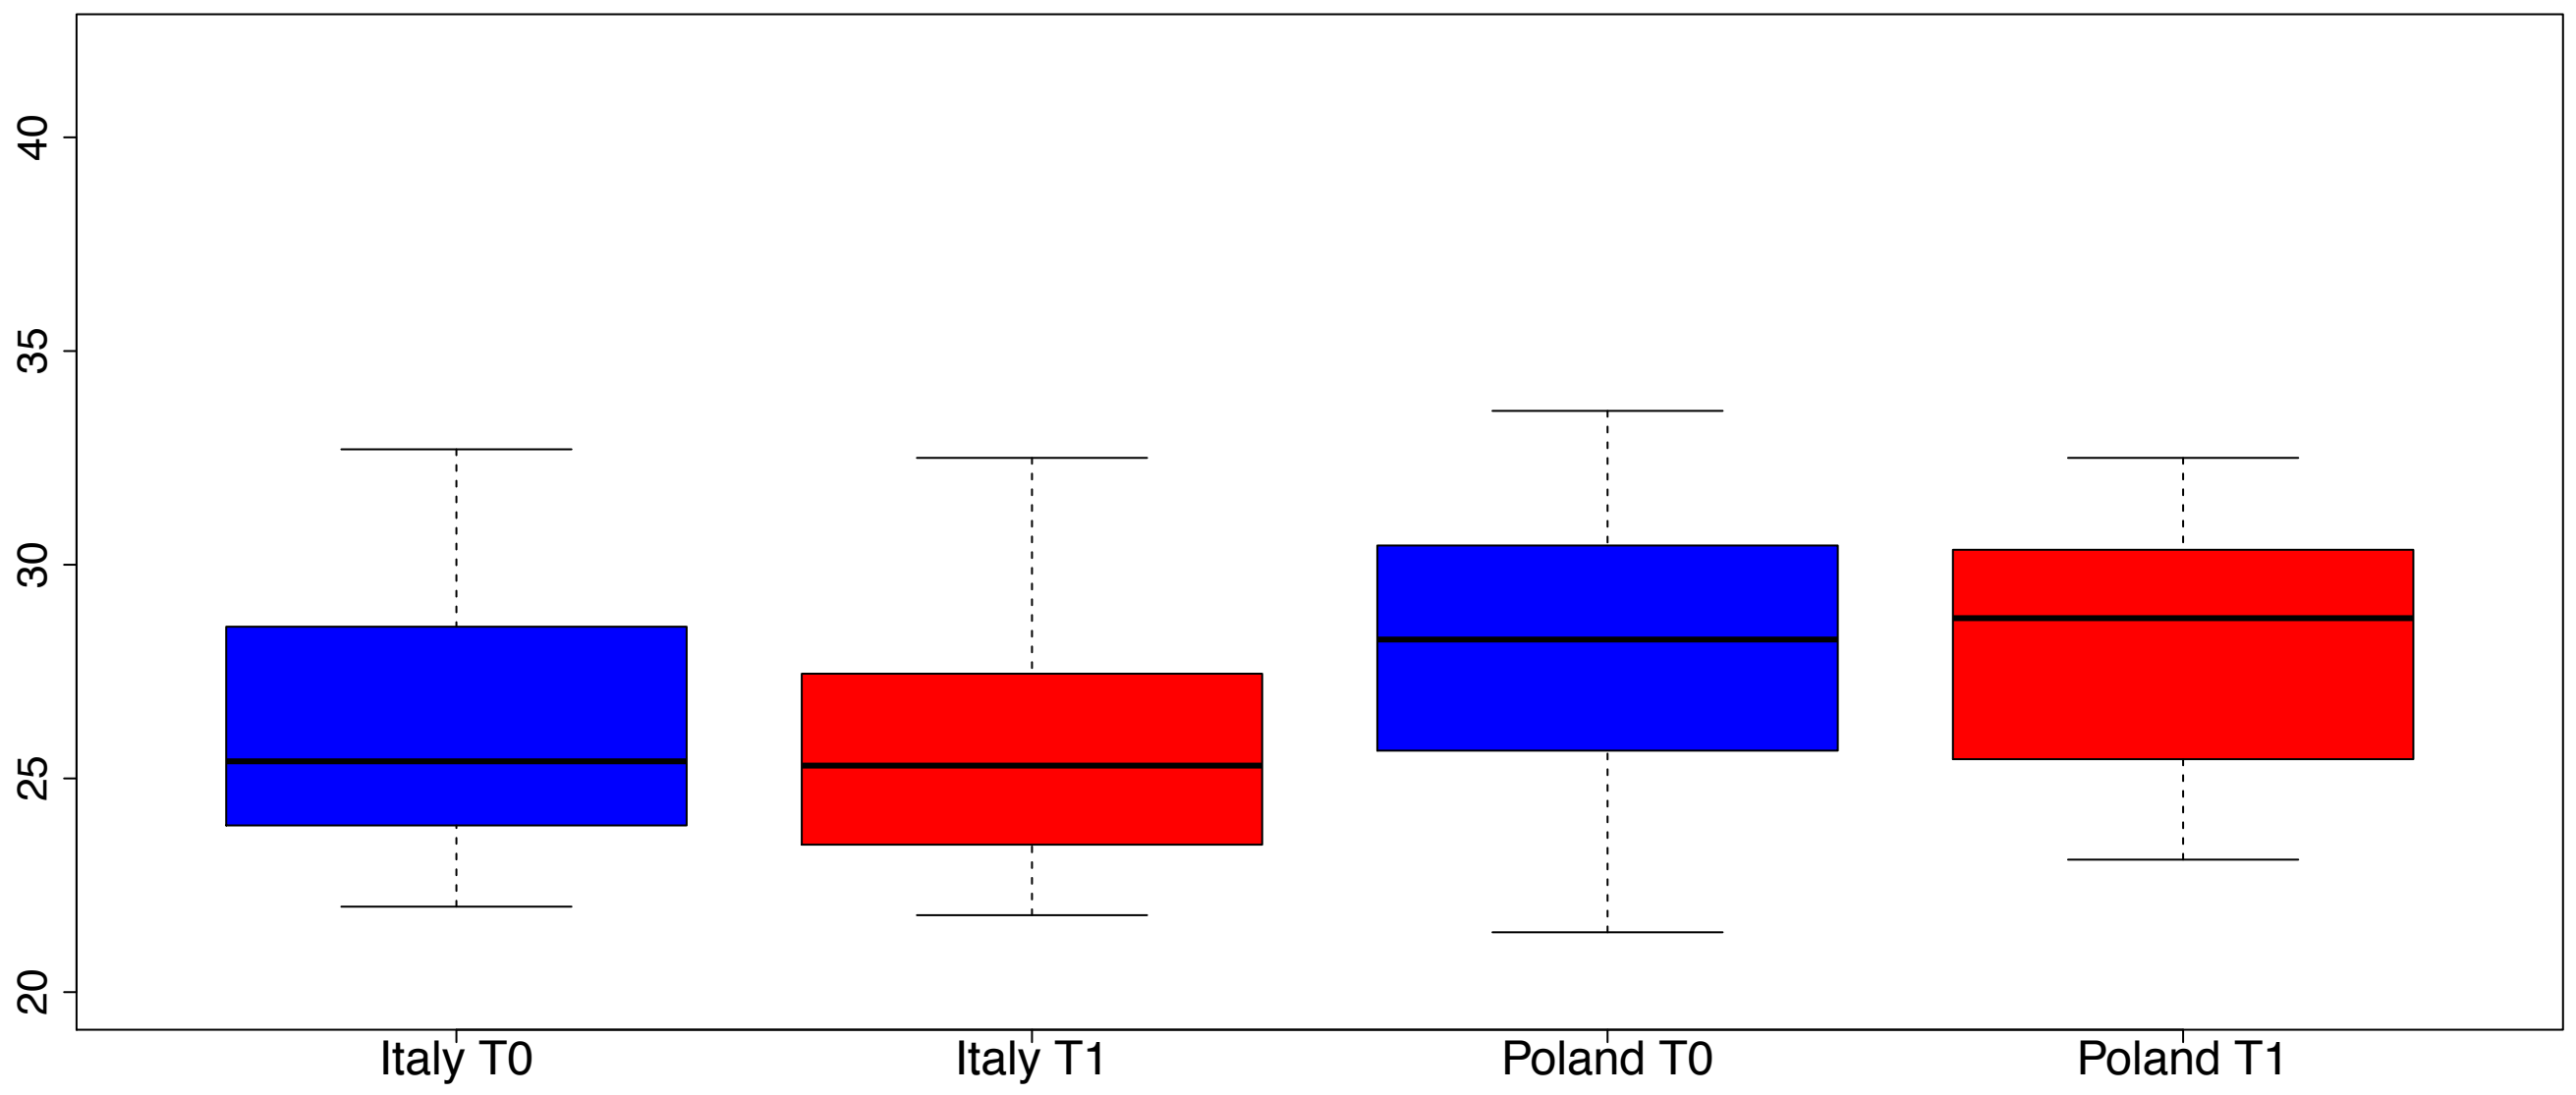

**Females**

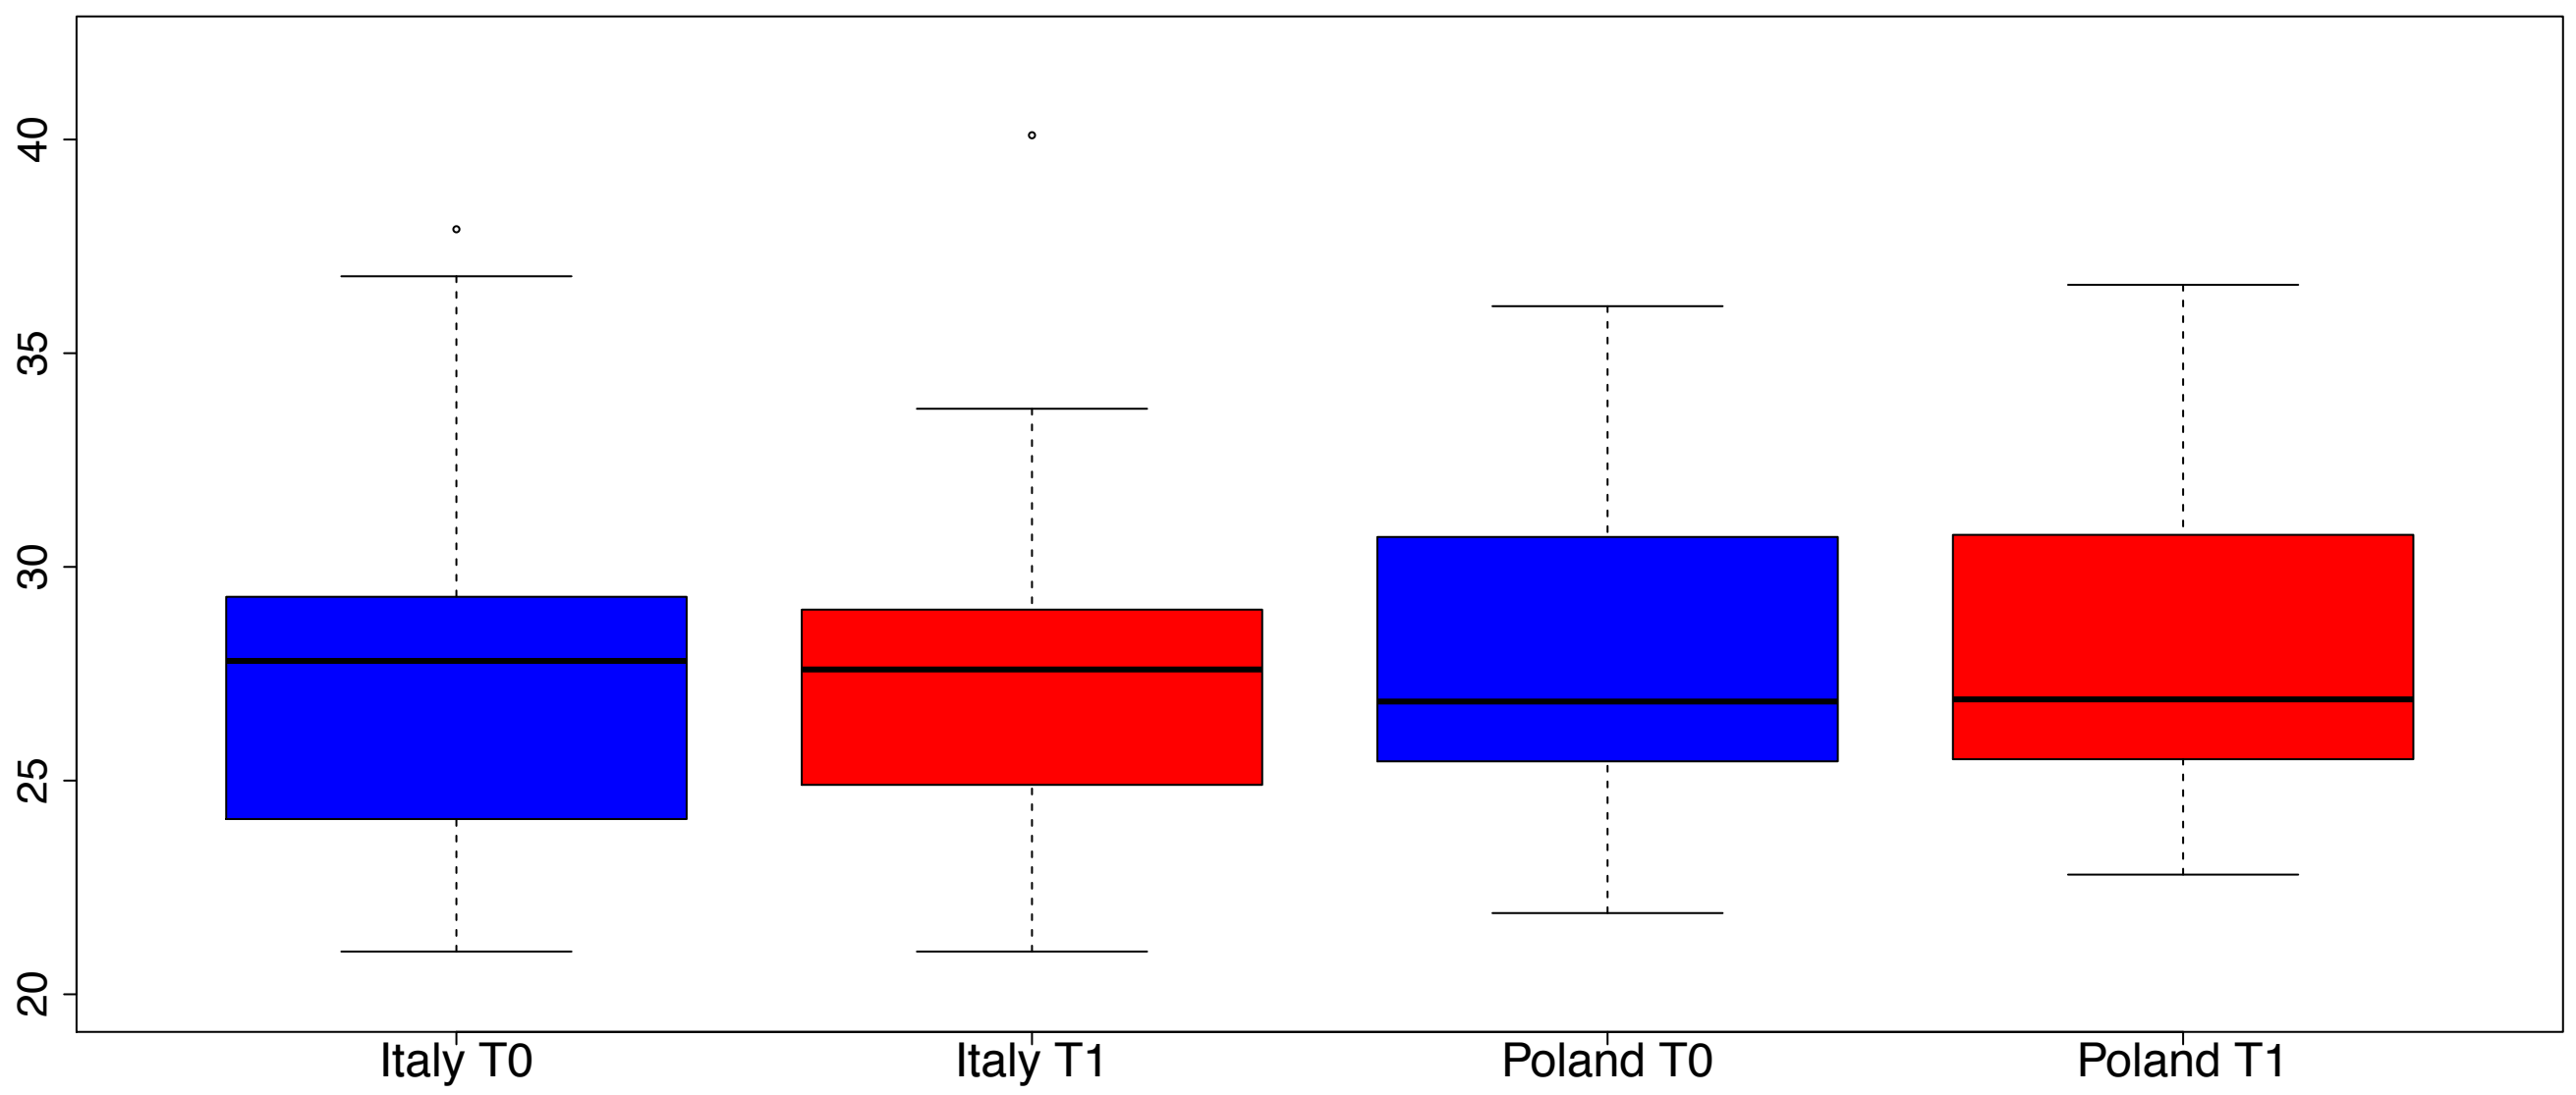

Supplement: 11357_2019_149_MOESM2_ESM.pdf [file 11357_2019_149_MOESM2_ESM.pdf]
