# Supplementary material
Source: PubMed Central journal article supplement (PMC7205958)

**Italy**  
Males p:0 Females p:0

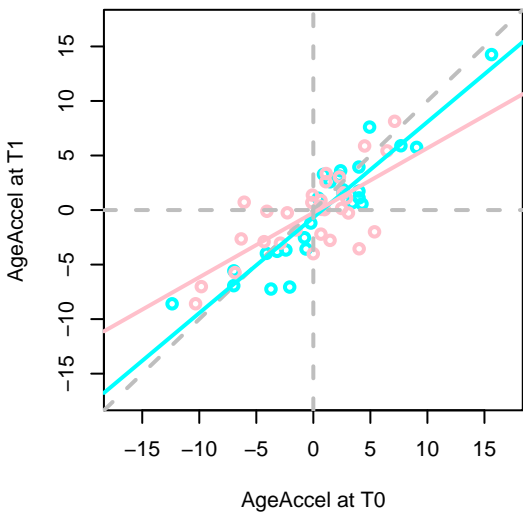

**Poland**  
Males p:0.001 Females p:0

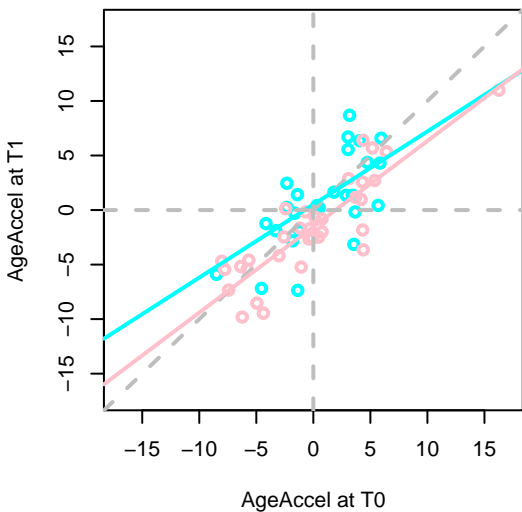

**Italy**  
Males p:0 Females p:0

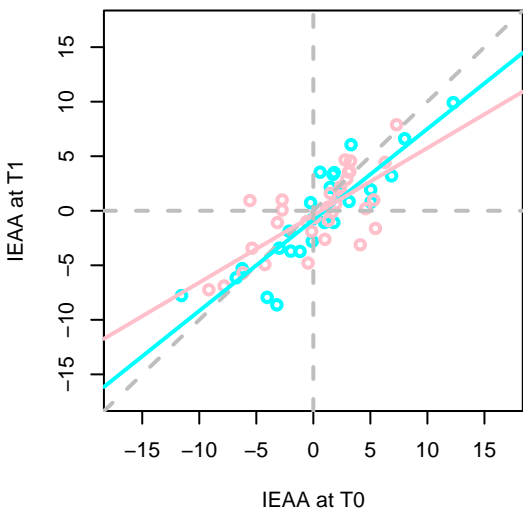

**Poland**  
Males p:0.0055 Females p:0

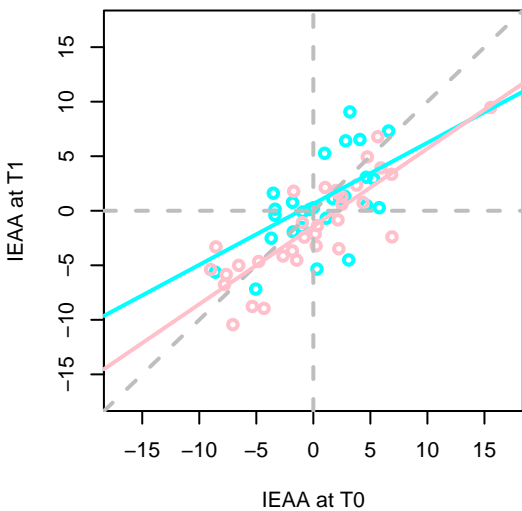

**Italy**  
Males p:0 Females p:0

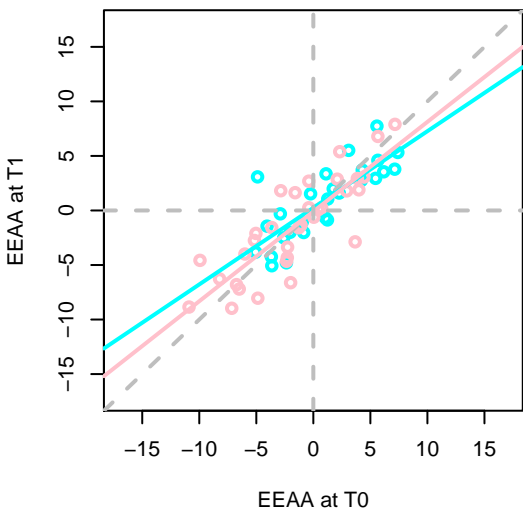

**Poland**  
Males p:0 Females p:0

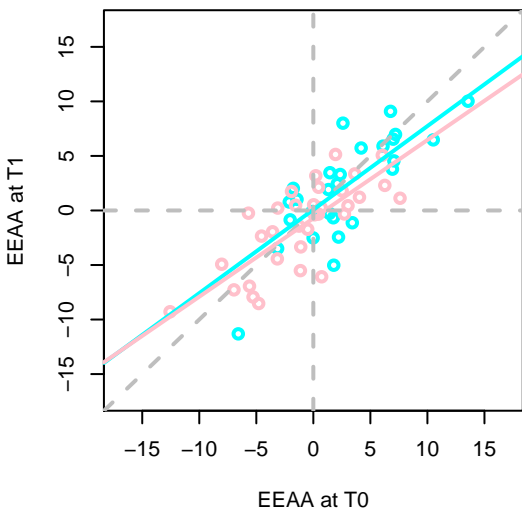

Supplement: 11357_2019_149_MOESM3_ESM.pdf [file 11357_2019_149_MOESM3_ESM.pdf]
