# Supplementary material
Source: PubMed Central journal article supplement (PMC7205958)
Supplement: 11357_2019_149_MOESM5_ESM.pdf [file 11357_2019_149_MOESM5_ESM.pdf]

AgeAccel

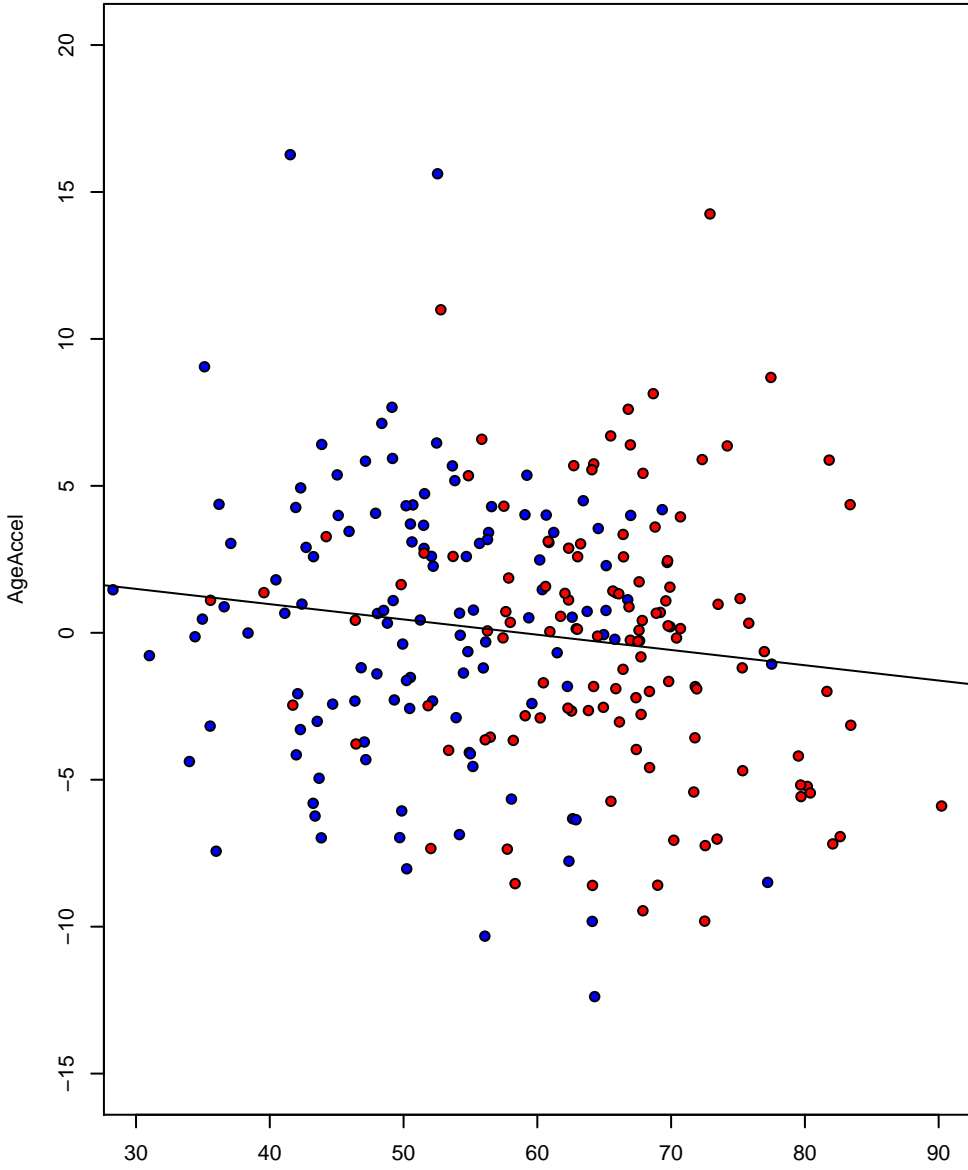

NU-AGE score  
pvalue: 0.0372021130806068

IEAA

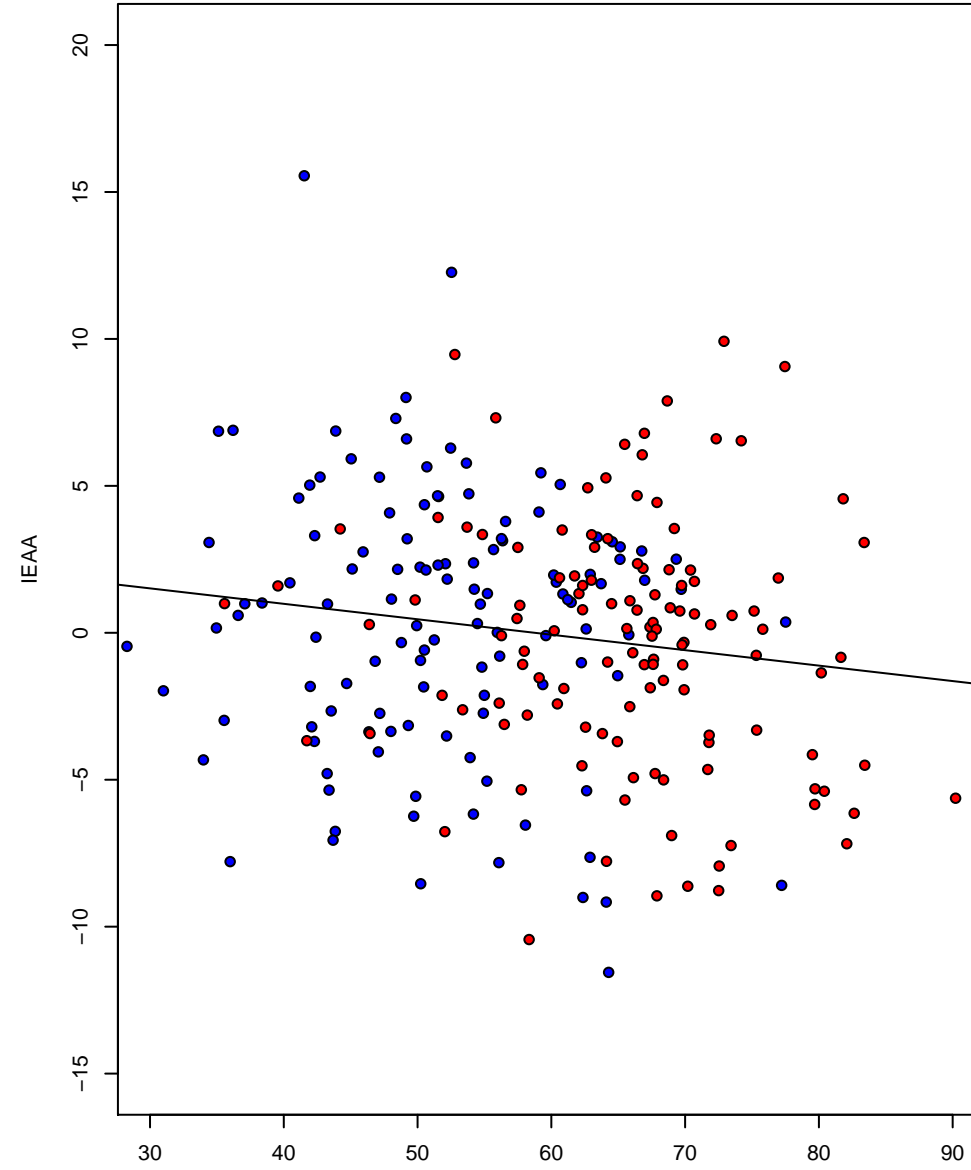

NU-AGE score  
pvalue: 0.0274886909111795

EEAA

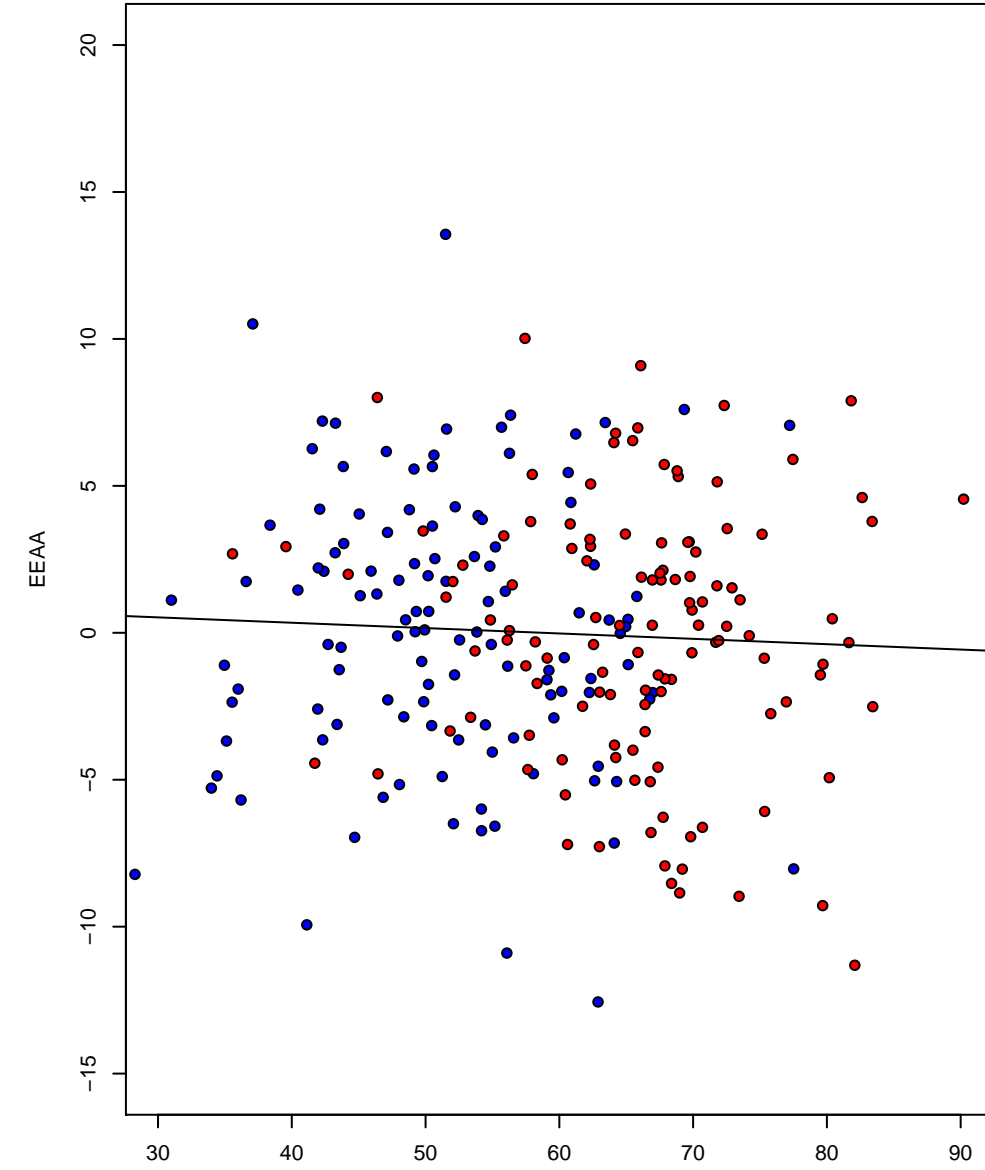

NU-AGE score  
pvalue: 0.456490131563061
